# Supplementary material
Source: PubMed Central journal article supplement (PMC2522353)
Supplement: JCI0835700sd.pdf [file JCI0835700sd.pdf]

**Supplementary Table 1**

| Patient   | Time Point | Total reads | Unique reads | % in Refseq       | Tx start §        | CpG ¥             | 2 DNaseI sites ¶  |
|-----------|------------|-------------|--------------|-------------------|-------------------|-------------------|-------------------|
| 7         | 24         | 746         | 97           | 36,1              | 78,4              | 14,4              | 89,7              |
| 7         | 68 BM      | 746         | 35           | 31,4              | 80,0              | 8,6               | 82,9              |
| 7         | 68 PBMC    | 595         | 22           | 45,5              | 95,5              | 9,1               | 86,4              |
| 7         | 69         | 2639        | 144          | 43,1              | 76,4              | 8,3               | 86,8              |
| Pooled 7  | ---        | 4726        | 298          | 39.6 (p = 0.16)   | 78.9 (p < 0.0001) | 10.4 (p < 0.0001) | 87.2 (p < 0.0001) |
| 10        | 31         | 965         | 191          | 42,4              | 80,6              | 13,1              | 83,8              |
| 10        | 33         | 99          | 31           | 25,8              | 71,0              | 6,5               | 90,3              |
| 10        | 40         | 1101        | 97           | 49,5              | 79,4              | 6,2               | 87,6              |
| Pooled 10 | ---        | 2165        | 319          | 42.9 (p = 0.0082) | 79.3 (p < 0.0001) | 10.3 (p < 0.0001) | 85.6 (p < 0.0001) |
| Random    | ---        | 3937        | 3937         | 35,6              | 46,7              | 0,9               | 51,4              |

BM = Bone Marrow

PBMC = Peripheral Blood Mononuclear Cell

§ % within 50 Kb upstream or downstream of transcription start site

¥ % within 1 Kb upstream or downstream of CpG island midpoint

¶ % within 50 Kb upstream or downstream of two mapped DNaseI hypersensitivity sites
